# Supplementary material for: Diversifying history: A large-scale analysis of changes in researcher demographics and scholarly agendas
Source: PubMed Central journal article supplement (PMC8769356; doi:10.1371/journal.pone.0262027), 2022-01-19
Supplement: pone.0262027.s001.pdf [file pone.0262027.s001.pdf]

## **S1 Text**

### **Text A. Correlated topic models**

We used Correlated Topic Modeling (CTM) to identify research areas and themes discussed in 10,367 full-text articles for the period 1951 to 2014 from a set of History journals published in the US. CTM is a natural language processing technique that uncovers latent dimensions in text corpora, i.e., “topics” as sets of terms weighted by their co-occurrence in the same documents. Prior work finds CTM to be superior to Latent Dirichlet Allocation in this context (particularly for held out log probability, which lets CTM cover a larger K value of topics better than LDA) [1].

The input to CTM is a document term matrix. In our case, the terms we use are n-grams (unigrams, bigrams, and trigrams). To generate this matrix we first stem words, remove stop words (overly common terms), numbers, punctuation, and words that are less than three characters and which occur in more than one document. This rendered our text into 356,140 unigrams, bigrams, or trigrams. (We retain low frequency terms because much of historical knowledge is contextually specific. We believe this retains the greatest nuance in the data, but also it comes with the cost of additional computing time and power.) CTM then identifies topics in this matrix by finding sets of terms weighted by their rate of co-occurrence. We identified the history topics most indicative and predictive of the terms used in our corpus through a variety of fit metrics (held-out likelihood, residuals, semantic coherence, and lower bound tests) from the Search K package in R (Appendix C). These metrics identify how different numbers of topics can result in sets of terms with greater/lesser internal consistency and predictive power. An optimal fit was found across these metrics for 90 topics.

CTM also produces an assessment of each document fed into the model, allowing us to interpret each document as a mixture of the topics generated. While CTM does not automatically label a topic, we name each topic based on frequently used words and exemplary journal articles that ranked highest in each topic. For example, the CTM generated a topic where the words “family,” “children,” “marriage,” “household,” and “parent” were frequently co-used. In addition, we looked at documents that heavily employed the topic to discern what the terms reflected. After manual inspection, we labeled this topic “family and households.” Among the 90 generated topics, eight topics were associated with dataset noise, and therefore excluded from our analysis. The rest of topics were then categorized into significant history subfields and general approaches.

### **Text B. Fit metrics**

Running a Correlated Topic Model requires that the researcher determines a value of K, or the number of topics. K is not automatically selected by the CTM, and instead, researchers need to find a number that optimizes the coherence and exclusivity of topics. If we set the number of topics too low, words describing topics might not sufficiently overlap (i.e., describing one topic); in addition, the scope of topic might be too broad to maintain the coherence of words. By contrast, if we extract too many topics, each topic might be coherent, but the same words can be adopted by many different topics. Thus, K value selection depends on how much coherence can be spared to maximize exclusivity, and vice versa.

To find the right number of topics that can balance coherence and exclusivity, we checked the internal validity of the model by increasing the number of topics from 60 to 120 topics in steps of 10 additional topics for each model. To check the internal validity, we used four

measures. Figure 1 above presents the results of these metrics for values of K ranging from 60 to 120. For these diagnostics, we used the function ‘searchK’ from ‘stm’ library in R.

First, held-out likelihood (top left in S1 Fig), sometimes called held-out log likelihood, is a measure to show the predictive power of topic models [2]. This method subsets 10% of the analyzed documents and holds out 50% of words in them. Then, it re-runs the same evaluative measures and compares them to the results without removing words. When held-out likelihood is high, it means the topic model has high predictive power. Second, residuals (top right) shows estimated residuals dispersion. Overdispersion means that we still need to add extra topics to absorb residuals [2]. Thus, we want to minimize our residual metric to increase our model’s explanatory power. Third, semantic coherence (bottom left) is a metric that measures how much the words frequently used in the topic are co-occurring together [3]. For example, when “woman” and “movement” are the most probable words in the topic about feminism, the coherence of this topic is high when these two words are used simultaneously in the same document repeatedly. Thus, semantic coherence corresponds most closely with human interpretation of topic quality. As we evaluate the topic quality is good when the metric is high, we want to maximize it as much as possible without sacrificing the other metrics too much. Last, the lower bound (bottom right) represents the model’s internal fit by measuring convergence. If the changes in convergence become less and less distinct as we raise the value of K, we can be satisfied that the model has converged. Here, we are not looking simply for maximization, but for the point where increasing K further provides diminishing returns.

Although we aim to find the flattened part in the curve where neither gains nor losses are found by adding more topics [2], our results in Figure 1 do not provide a clear signal. Instead, it shows that the constant advantage of using a higher K in held-out likelihood, residuals, and lower bound, and at the same time, the constant disadvantage higher K’s have to semantic coherence. Therefore, we select a middle ground by choosing 90 topics that optimize semantic coherence without raising the other values too sharply. Additionally, the output for 90 topics covered the anticipated range of topics and subfields we expected to find in our dataset (e.g., topics historians expect to find).

### **Text C. Gender disambiguation**

Inferring genders from names is a complex endeavor. Please see the body of the article for the limitations and ethical concerns associated with these methods. A name’s association can reverse over time—“Leslie” was a “male” first name until the early twentieth century but has since become a “female” first name in the United States [4]. Additionally, the association between names and genders depends on the country. Take “Jan,” for example. Per Social Security Administration (SSA) data, “Jan” is a “female” name in 71% of cases in the United States [5]. In the Netherlands and Germany, however, “Jan” is almost always a “male” name. Our goal in inferring genders from first names was to automate the process as much as possible, while taking care to identify ambiguous cases and labeling those by hand. As we mention in the body of the article, automated gender inference is used not to predict or determine an individual’s gender, but to analyze gender dynamics in the historical profession as a whole.

To achieve this goal, we used two complementary methods: comparison with unique names in the dataset provided by the SSA and with the Python “gender-guesser” library [6]. With both of these methods, if the name was consistently “male” or “female,” we took that result. If, however, the name was ambiguous because the first name presented only as an initial (“H. Michael”) or because the name was unisex (“Jaime Elizabeth”), we also examined the middle

name. If the middle name was classified as “male” or “female,” we returned that as the result. If neither name could be classified, we returned “ambiguous” and labeled the name manually.

For our first method—inferring gender using SSA data—we grouped results into five categories. If a name was given to women in 95% or more of all cases, we labeled it “female”—and vice versa for men. If a name was given to women or men between 85% and 95%, we labeled it “mostly female” or “mostly.” We tagged all other names “ambiguous.”

In addition to SSA data, we used the Python “gender-guesser” library. This library is an off the shelf tool to infer gender from names. While the provenance of the data that it uses is hard to track, the underlying dataset was compiled by Jörg Michael, a German computer scientist, in 2008. A recent study comparing five similar libraries and services found that the “gender-guesser” had the lowest misclassification rate, meaning that it, although it labels many names “ambiguous,” it rarely assigned the wrong gender to a name [7; 8]. An additional advantage of the gender-guesser library, for our purposes, is that it includes data not just from the United States but also from most European as well as some Asian countries. With SSA data, for example, both “Jean” and “Patrice” are labeled “female,” but the gender-guesser library tags both of them “ambiguous” because they can also be “male” names in France. Hence, the gender-guesser library helped us question some of the results obtained with SSA data and identify names that should be reexamined.

Once we had the inferred genders using both SSA data and the gender-guesser library, we compared them. If one method presumed a person to be “male” and the other classified them as “male” or “mostly male,” we classified that person “male”—and vice versa for women. In any other case, for example where the two methods disagreed or when one method labeled the gender “ambiguous,” we tried to identify the author’s gender manually via an internet search, using, for example, faculty web pages or news releases. If we still could not identify the gender of an author, we labeled the gender “unknown.”

Overall, for the journal dataset, we were able to identify 6821 authors (84.3%) automatically, using SSA data and the “gender-guesser,” and 1044 authors (12.8%) by tagging them manually, leaving 231 authors (2.9%) with unknown genders. For the dissertation dataset, we identified the genders of 20771 authors (97.4%) automatically and 319 authors (1.5%) by tagging them manually, leaving 230 authors (1.1%) with unknown genders. Our automatic taggers were more successful on the dissertation dataset for a number of reasons. First, many journal articles include an author’s initials instead of full name. Second, the dissertation dataset more often includes middle names than the journal dataset. Finally, the journal dataset is more international than the dissertation dataset, rendering the US SSA dataset less useful.

#### **Text D. Gini coefficients**

To calculate the gini coefficient for a topic and year, we first formed a document-topic matrix ( $A$ ) for that year. Next, we calculated a co-occurrence matrix  $C$  by multiplying  $A$  with its own transpose ( $C = A * A.T$ ). Finally, we calculated the gini coefficients for each topic by using the rows in  $C$  representing each topic.

#### **Text E. Overrepresented topics among women**

To calculate the topics that are overrepresented among women writing about military history, we first selected only articles scoring in the top 10% for the military history. Then we formed two sub-corpora, one for men (830 articles) and one for women (134 articles) and compared them using Dunning’s log-likelihood statistic [9]. In the women’s corpus, the five most over-

represented topics were “Women and Gender,” “Family,” “Film, Memory, and Documentation,” “Body History,” and “Cultural History of the Civil War.”

**Text F. Gender and women’s history in the cultural history of war**

Specifically, gender and women’s history is well represented in such titles as “Walking the Streets in a Way No Decent Woman Should”; “Women Police in World War I”; “French Volunteer Nursing and the Myth of War Experience in World War I”; “Sex, Citizenship, and the Nation in World War II Britain”; “Altars of Sacrifice: Confederate Women and the Narratives of War”; Black Professionals and Race Consciousness: Origins of the Civil Rights Movement”; and “Battle Time: Gender, Modernity, and Confederate Hospitals.” For additional explanation, see Risi, “Differences within Topics” (last modified 25 May 2020),

[https://github.com/srisi/gender\\_history/blob/master/writeups/differences\\_within\\_topics.md](https://github.com/srisi/gender_history/blob/master/writeups/differences_within_topics.md)

**Text G. Analysis of how dissertations load on the 90 journal topics**

To best capture how dissertations relate to the journal topics, we first aligned the vocabulary of the dissertation dataset to the journal topic dataset vocabulary. This means that terms present in the dissertation dataset, but not the journal dataset, were discarded. Among 10,000 high frequency terms in dissertation abstracts (ProQuest Dissertation & Theses database), 94% of terms were found in journal articles (JSTOR database).

Given that the two corpora—dissertations and journal articles—are similar in the usage of terms, we apply our Correlated Topic Model (CTM) results generated from the journal articles to dissertation abstracts. In our CTM results from journal articles, each term has a load (weighted score) to the 90 topics. Using the CTM results, we apply the information of loads from terms to topics to the corpus of dissertations. For example, if “woman” has high weight to the gender topic from our CTM results of journal articles, we can infer that a doctoral dissertation using “woman” multiple times will have high load on the gender topic. In this manner, we can use the same topics to analyze the dissertations as the journals, while still allowing an overview of how similar or dissimilar the datasets are.

**Table A. Top 100 articles with the highest weight for the topic “women and gender”**

| Topic Weight | Year | Author Gender | Title                                                                                                                              |
|--------------|------|---------------|------------------------------------------------------------------------------------------------------------------------------------|
| 0.46         | 1994 | female        | "To Educate Women into Rebellion": Elizabeth Cady Stanton and the Creation of a Transatlantic Network of Radical Suffragists       |
| 0.446        | 1993 | female        | Beyond the Feminine Mystique: A Reassessment of Postwar Mass Culture, 1946- 1958                                                   |
| 0.431        | 1990 | female        | Liberal Ideology, Sexual Difference, and the Lives of Women: Recent Works in British History                                       |
| 0.431        | 1987 | female        | Working Women, Class Relations, and Suffrage Militance: Harriot Stanton Blatch and the New York Woman Suffrage Movement, 1894-1909 |
| 0.421        | 1981 | female        | Reflections on Twentieth-Century American Women's History                                                                          |

|       |      |         |                                                                                                                        |
|-------|------|---------|------------------------------------------------------------------------------------------------------------------------|
| 0.421 | 1989 | female  | What's in a Name? The Limits of 'Social Feminism;' or, Expanding the Vocabulary of Women's History                     |
| 0.419 | 1988 | female  | Separate Spheres, Female Worlds, Woman's Place: The Rhetoric of Women's History                                        |
| 0.399 | 2007 | female  | Rethinking the Socialist Construction and International Career of the Concept "Bourgeois Feminism"                     |
| 0.391 | 1982 | female  | Expanding the Past: Recent Scholarship on Women in Politics and Work                                                   |
| 0.38  | 1993 | unknown | The Changing Critical Fortunes of the Second Sex                                                                       |
| 0.379 | 1986 | female  | The Doctrine of "Equality in Difference" for Women: A Case Study of Male Feminism in Nineteenth-Century French Thought |
| 0.371 | 1992 | female  | The Manly Pursuit of a Partnership between the Sexes: The Debate over YMCA Programs for Women and Girls, 1914-1933     |
| 0.369 | 1987 | female  | Outgrowing the Compact of the Fathers: Equal Rights, Woman Suffrage, and the United States Constitution, 1820-1878     |
| 0.369 | 1987 | unknown | Women of Their Time: The Growing Recognition of the Second Sex in Victorian and Edwardian England                      |
| 0.365 | 1987 | female  | Century of Struggle, Decades of Revision: A Retrospective on Eleanor Flexner's Suffrage History                        |
| 0.356 | 1986 | female  | Gender: A Useful Category of Historical Analysis                                                                       |
| 0.351 | 1989 | female  | Women's Labor History, 1790-1945                                                                                       |
| 0.348 | 1984 | female  | The Domestication of Politics: Women and American Political Society, 1780-1920                                         |
| 0.345 | 1992 | unknown | The "Other" as Political Symbol: Images of Indians in the Woman Suffrage Movement                                      |
| 0.342 | 1988 | female  | The Professionalization of Benevolence: Evangelicals and Social Workers in the Florence Crittenton Homes, 1915 to 1945 |
| 0.342 | 1974 | female  | The New Woman: Changing Views of Women in the 1920s                                                                    |
| 0.333 | 2012 | female  | The Big Tent of U.S. Women's and Gender History: A State of the Field                                                  |
| 0.331 | 1990 | female  | Gender                                                                                                                 |
| 0.331 | 1976 | male    | Cookbooks and Law Books: The Hidden History of Career Women in Twentieth Century America                               |
| 0.322 | 2012 | female  | Can We Have a Total American History? A Comment on the Achievements of Women's and Gender History                      |

|       |      |         |                                                                                                                                            |
|-------|------|---------|--------------------------------------------------------------------------------------------------------------------------------------------|
| 0.321 | 1989 | female  | Working-Class Feminism and the Family Wage Ideal: The Seattle Debate on Married Women's Right to Work, 1914-1920                           |
| 0.32  | 1969 | female  | New Approaches to the Study of Women in American History                                                                                   |
| 0.317 | 1990 | mixed   | Womanly Duties: Maternalist Politics and the Origins of Welfare States in France, Germany, Great Britain, and the United States, 1880-1920 |
| 0.316 | 1984 | unknown | The Contribution of Women to Modern Historiography in Great Britain, France, and the United States, 1750-1940                              |
| 0.312 | 2012 | female  | The Impact of Racial and Sexual Politics on Women's History                                                                                |
| 0.307 | 1971 | male    | Comment: ["Women in the Russian Radical Movement" and "Women Reformers and American Culture, 1870-1930"]                                   |
| 0.306 | 1978 | female  | Woman's Place: A Critical Review of Anthropological Theory                                                                                 |
| 0.302 | 2012 | female  | Gender, Generations, Leadership                                                                                                            |
| 0.296 | 1992 | female  | "Nous Autres": Reading, Passion, and the Creation of M. Carey Thomas                                                                       |
| 0.296 | 1990 | female  | Finding a Cure for War: Women's Politics and the Peace Movement in the 1920s                                                               |
| 0.294 | 1999 | female  | Working on White Womanhood: White Working Women in the San Francisco Anti-Chinese Movement, 1877-1890                                      |
| 0.294 | 1988 | female  | "We Are Engaged as a Band of Sisters": Class and Domesticity in the Washingtonian Temperance Movement, 1840-1850                           |
| 0.294 | 2001 | male    | "A New World for Women"? Abortion Law Reform in Britain during the 1930s                                                                   |
| 0.293 | 2000 | female  | "The Best or None!" Spinsterhood in Nineteenth-Century New England                                                                         |
| 0.291 | 1986 | female  | "Moral Suasion Is Moral Balderdash": Women, Politics, and Social Activism in the 1850s                                                     |
| 0.285 | 1994 | female  | "Walking the Streets in a Way No Decent Woman Should": Women Police in World War I                                                         |
| 0.284 | 1992 | female  | Introduction: History and Feminist Theory, or Talking Back to the Beadle                                                                   |
| 0.283 | 1962 | male    | The Split of Feminist Movement in 1869                                                                                                     |
| 0.283 | 2009 | female  | Sons, Daughters, and Patriarchy: Gender and the 1968 Generation                                                                            |
| 0.283 | 1990 | male    | Political Style and Women's Power, 1830-1930                                                                                               |

|       |      |         |                                                                                                                                            |
|-------|------|---------|--------------------------------------------------------------------------------------------------------------------------------------------|
| 0.283 | 1987 | unknown | Class and Patriarchy as Competing Paradigms for the Study of Middle Eastern Women                                                          |
| 0.279 | 1982 | female  | Women in the Professions: A Research Agenda for American Historians                                                                        |
| 0.279 | 1995 | female  | Beyond Complicity versus Resistance: Recent Work on Gender and European Imperialism                                                        |
| 0.275 | 2002 | female  | From Mexico to Copenhagen to Nairobi: The United Nations Decade for Women, 1975-1985                                                       |
| 0.274 | 2008 | female  | A History of "Gender"                                                                                                                      |
| 0.27  | 1971 | female  | Women Reformers and American Culture, 1870-1930                                                                                            |
| 0.27  | 1982 | female  | Zenanas and Girlless Villages: The Ethnology of American Evangelical Women, 1870-1910                                                      |
| 0.268 | 1984 | female  | The Charitable and the Poor: The Emergence of Domestic Politics in Augusta, Georgia, 1860-1880                                             |
| 0.267 | 2012 | male    | "Russian Blonde in Space": Soviet Women in the American Imagination, 1950-1965                                                             |
| 0.267 | 1991 | female  | Black and White Visions of Welfare: Women's Welfare Activism, 1890-1945                                                                    |
| 0.265 | 1999 | female  | Feminism, Social Science, and the Meanings of Modernity: The Debate on the Origin of the Family in Europe and the United States, 1860-1914 |
| 0.264 | 2012 | female  | Gender Identity and the Gendered Process                                                                                                   |
| 0.264 | 2010 | female  | The Incorporation of American Feminism: Suffragists and the Postbellum Lyceum                                                              |
| 0.262 | 2002 | female  | Rape without Women: Print Culture and the Politicization of Rape, 1765-1815                                                                |
| 0.262 | 1975 | female  | Leadership and Tactics in the American Woman Suffrage Movement: A New Perspective from Massachusetts                                       |
| 0.261 | 2001 | female  | Shrinking Violets and Caspar Milquetoasts: Shyness and Heterosexuality from the Roles of the Fifties to "The Rules" of the Nineties        |
| 0.26  | 2008 | female  | The Three Ages of Joan Scott                                                                                                               |
| 0.255 | 2005 | female  | Incarnations and Practices of Feminine Rectitude: Nineteenth-Century Gymnastics for U.S. Women                                             |
| 0.254 | 2008 | female  | Unanswered Questions                                                                                                                       |
| 0.254 | 2010 | female  | Writing Women's Lives: One Historian's Perspective                                                                                         |
| 0.253 | 1983 | female  | Labor's True Woman: Domesticity and Equal Rights in the Knights of Labor                                                                   |
| 0.251 | 1981 | mixed   | The Limits of Suffragist Behavior: Legalism and Militancy in France, 1876-1922                                                             |

|       |      |        |                                                                                                                              |
|-------|------|--------|------------------------------------------------------------------------------------------------------------------------------|
| 0.245 | 2001 | male   | Gender and Working Class Identity in Britain during the 1950s                                                                |
| 0.243 | 2004 | male   | "The Forgetfulness of Sex": Devotion and Desire in the Courtship Letters of Angelina Grimke and Theodore Dwight Weld         |
| 0.243 | 1988 | female | Women and Capitalism: Oppression or Emancipation? A Review Article                                                           |
| 0.243 | 2004 | female | Policing Male Heterosexuality: The Reformation of Manners Societies' Campaign against the Brothels in Westminster, 1690-1720 |
| 0.242 | 1986 | female | Between Two Worlds: Business Women in a Chicago Boarding House 1900-1930                                                     |
| 0.242 | 1982 | female | Saint-Simonian Men/Saint-Simonian Women: The Transformation of Feminist Thought in 1830s' France                             |
| 0.241 | 1980 | male   | The History of European Women: A Critical Survey of Recent Research                                                          |
| 0.241 | 1984 | female | Women in Groups: An Analysis of Women's Benevolent Organizations in New York and Boston, 1797-1840                           |
| 0.24  | 1984 | female | Depopulation, Nationalism, and Feminism in Fin-de-Siècle France                                                              |
| 0.239 | 1994 | female | Constructing Internationalism: The Case of Transnational Women's Organizations, 1888-1945                                    |
| 0.239 | 1982 | female | Sexuality in Nineteenth-Century America: Behavior, Ideology, and Politics                                                    |
| 0.237 | 1991 | female | "The Anchor of My Life": Middle-Class American Mothers and College-Educated Daughters, 1880-1920                             |
| 0.234 | 1991 | mixed  | The Politics of Gender and the Making of the Welfare State, 1900-1940: A Comparative Perspective                             |
| 0.233 | 2007 | female | World History and the History of Women, Gender, and Sexuality                                                                |
| 0.231 | 1985 | mixed  | Female Ballots: The Impact of the Nineteenth Amendment                                                                       |
| 0.231 | 2004 | female | Global Feminism and Postwar Reconstruction: The World YWCA Visitation to Occupied Japan, 1947                                |
| 0.23  | 1990 | female | A Call for Comparisons                                                                                                       |
| 0.23  | 1995 | female | The Woman's Room: Some Aspects of Gender Relations in Tenochtitlan in the Late Pre-Hispanic Period                           |
| 0.229 | 1996 | female | French Volunteer Nursing and the Myth of War Experience in World War I                                                       |
| 0.226 | 1986 | female | Women's Rights and Society's Needs: Japan's 1931 Suffrage Bill                                                               |



|       |      |         |                                                                                                          |
|-------|------|---------|----------------------------------------------------------------------------------------------------------|
| 0.226 | 2010 | female  | "Those by Whose Side We Have Labored": American Jewish Women and the Peace Movement between the Wars     |
| 0.225 | 1999 | male    | Prostitutes in History: From Parables of Pornography to Metaphors of Modernity                           |
| 0.225 | 1989 | female  | Gender Systems in Conflict: The Marriages of Mission-Educated Chinese American Women, 1874-1939          |
| 0.225 | 1982 | female  | The Pursuit of Married Love: Women's Attitudes toward Sexuality and Marriage in Great Britain, 1918-1939 |
| 0.223 | 1996 | female  | Embracing the Status Quo: French Communists, Young Women and the Popular Front                           |
| 0.221 | 1972 | male    | Coeducation of the Sexes at Oberlin College: A Study of Social Ideas in Mid-Nineteenth-Century America   |
| 0.221 | 1980 | female  | A "New Frontier" for Women: The Public Policy of the Kennedy Administration                              |
| 0.22  | 1996 | female  | Comment: Native American Women's Responses to Christianity                                               |
| 0.22  | 2008 | unknown | Chinese History: A Useful Category of Gender Analysis                                                    |
| 0.22  | 2002 | female  | Walking on the Periphery: Gender and the Discourse of Modernization                                      |
| 0.22  | 2002 | female  | Rescuing Women and Children                                                                              |
| 0.219 | 2000 | mixed   | Teaching Gender History to Secondary School Students                                                     |
| 0.216 | 1969 | male    | Anna Howard Shaw: New Approaches to Feminism                                                             |

**Table B. Ten most distinctive terms by frequency score for women-authored articles that mention the term “gender” at least ten times (174 documents)**

| Term     | Dunning Log-Likelihood Statistic | Frequency Score | Term Frequency, Women Historians | Term Frequency, Men Historians |
|----------|----------------------------------|-----------------|----------------------------------|--------------------------------|
| feminist | 620.7                            | 0.15            | 0.470%                           | 0.086%                         |
| feminism | 385.3                            | 0.18            | 0.336%                           | 0.074%                         |
| Chinese  | 414.3                            | 0.92            | 0.385%                           | 0.092%                         |
| welfare  | 111.8                            | 0.31            | 0.241%                           | 0.109%                         |
| movement | 175.0                            | 0.33            | 0.453%                           | 0.223%                         |
| women    | 2556.4                           | 0.34            | 7.429%                           | 3.843%                         |
| mothers  | 90.1                             | 0.35            | 0.284%                           | 0.150%                         |
| rights   | 92.1                             | 0.37            | 0.410%                           | 0.246%                         |
| woman    | 207.2                            | 0.38            | 1.041%                           | 0.646%                         |
| home     | 99.1                             | 0.38            | 0.512%                           | 0.320%                         |

Table B reports the distinctive terms addressed by women historians in articles that mention “gender” at least ten times.

**Table C. Ten most distinctive terms by frequency score for men-authored articles that mention the term “gender” at least ten times (93 documents)**

| Term        | Dunning Log-Likelihood Statistic | Frequency Score | Term Frequency, Women Historians | Term Frequency, Men Historians |
|-------------|----------------------------------|-----------------|----------------------------------|--------------------------------|
| gay         | 112.4                            | 0.73            | 0.056%                           | 0.154%                         |
| masculinity | 195.8                            | 0.71            | 0.140%                           | 0.337%                         |
| Americans   | 118.6                            | 0.67            | 0.142%                           | 0.288%                         |
| him         | 193.0                            | 0.67            | 0.232%                           | 0.471%                         |
| service     | 125.8                            | 0.67            | 0.155%                           | 0.312%                         |
| black       | 352.2                            | 0.67            | 0.439%                           | 0.882%                         |
| he          | 507.6                            | 0.64            | 0.104%                           | 0.182%                         |
| united      | 136.1                            | 0.63            | 0.322%                           | 0.546%                         |
| his         | 502.4                            | 0.62            | 0.135%                           | 0.223%                         |
| war         | 220                              | 0.62            | 0.616%                           | 1.001%                         |

Table C reports the distinctive terms addressed by men historians in articles that mention “gender” at least ten times.

**Table D. Ten most distinctive terms for articles in women’s and gender history published from 1970-1989**

| Term      | Dunning Log-Likelihood Statistic | Frequency Score | Term Frequency, 1970-1989 | Term Frequency, 1990-2009 |
|-----------|----------------------------------|-----------------|---------------------------|---------------------------|
| women     | 2419.0                           | 0.59            | 4.416%                    | 3.079%                    |
| work      | 887.5                            | 0.62            | 0.989%                    | 0.617%                    |
| family    | 862.0                            | 0.62            | 0.896%                    | 0.549%                    |
| percent   | 791.4                            | 0.69            | 0.352%                    | 0.158%                    |
| medical   | 606.7                            | 0.70            | 0.244%                    | 0.104%                    |
| age       | 512.3                            | 0.65            | 0.346%                    | 0.185%                    |
| table     | 508.5                            | 0.73            | 0.159%                    | 0.059%                    |
| married   | 455.4                            | 0.66            | 0.287%                    | 0.150%                    |
| data      | 403.6                            | 0.72            | 0.142%                    | 0.056%                    |
| household | 383.6                            | 0.66            | 0.228%                    | 0.116%                    |

Table D juxtaposes the most distinctive terms used by the top 10% articles with the greatest topic weight for “women and gender” in the periods 1970 to 1989. This is a comparison of the most distinctive terms by Dunning Log-Likelihood statistic used by the 10% articles with the greatest topic weight for “women and gender” in the periods 1970 to 1989 (275 documents) and 1990 to 2009 (650 documents).

**Table E. Ten most distinctive terms for articles in women’s and gender history published from 1990-2009**

| Term     | Dunning Log-Likelihood Statistic | Frequency Score | Term Frequency, 1970-1989 | Term Frequency, 1990-2009 |
|----------|----------------------------------|-----------------|---------------------------|---------------------------|
| gender   | 1534.9                           | 0.59            | 0.172%                    | 0.501%                    |
| white    | 1046.4                           | 0.62            | 0.162%                    | 0.413%                    |
| African  | 864.9                            | 0.62            | 0.060%                    | 0.218%                    |
| race     | 863.1                            | 0.69            | 0.047%                    | 0.193%                    |
| black    | 782.4                            | 0.70            | 0.156%                    | 0.363%                    |
| war      | 714.8                            | 0.65            | 0.237%                    | 0.466%                    |
| racial   | 688.8                            | 0.73            | 0.025%                    | 0.130%                    |
| nation   | 557.4                            | 0.66            | 0.050%                    | 0.161%                    |
| British  | 470.5                            | 0.72            | 0.062%                    | 0.169%                    |
| colonial | 451.8                            | 0.66            | 0.084%                    | 0.200%                    |

Table E juxtaposes the most distinctive terms used by the top 10% articles with the greatest topic weight for “women and gender” in the periods 1990 to 2009.

**Table F. The top 5 overrepresented topics for students with a man advisor, dissertations (1990 to 2015, 9633 documents)**

| Topic                                          | Dunning Log-Likelihood Statistic | Frequency Score | Average Topic Weight, Students with Female Advisors | Average Topic Weight, Students with Male Advisors |
|------------------------------------------------|----------------------------------|-----------------|-----------------------------------------------------|---------------------------------------------------|
| Military History                               | 4926.9                           | 0.36            | 1.739%                                              | 3.057%                                            |
| Political History of the Cold War              | 3896.1                           | 0.28            | 0.427%                                              | 1.087%                                            |
| Political History (Revolutions)                | 1738.3                           | 0.45            | 6.232%                                              | 7.547%                                            |
| German and Austro-Hungarian Diplomatic History | 1553.4                           | 0.27            | 0.146%                                              | 0.395%                                            |
| Islamic History                                | 1214.7                           | 0.37            | 0.473%                                              | 0.812%                                            |

We identified overrepresented topics using Dunning’s log-likelihood statistics, comparing students with women advisors to those with male advisors. Tables F and G report the top 5 overrepresented topics for students with a man advisor and woman advisor, respectively, for dissertations submitted from 1990 to 2015.

**Table G. The top 5 overrepresented topics for students with a woman advisor, dissertations (1990 to 2015, 3180 documents)**

| Topic                       | Dunning Log-Likelihood Statistic | Frequency Score | Average Topic Weight, Students with Female Advisors | Average Topic Weight, Students with Male Advisors |
|-----------------------------|----------------------------------|-----------------|-----------------------------------------------------|---------------------------------------------------|
| Women and Gender            | 27239.2                          | 0.74            | 5.257%                                              | 1.803%                                            |
| Consumption and Consumerism | 5388.9                           | 0.69            | 1.721%                                              | 0.785%                                            |
| Cultural Turn               | 4063.4                           | 0.59            | 5.216%                                              | 3.644%                                            |
| Body History                | 3279.8                           | 0.67            | 1.285%                                              | 0.641%                                            |
| Family                      | 2678.5                           | 0.63            | 1.629%                                              | 0.948%                                            |

**Table H. Top 10 dissertation topics that are overrepresented among dissertation writers (graduation dates between 1980 and 1999) *with* students (1306 documents)**

| Topic                                             | Dunning Log-Likelihood Statistic | Frequency Score | Average Topic Weight, Dissertation Writers <i>with</i> Descendants | Average Topic Weight, Dissertation Writers <i>without</i> Descendants |
|---------------------------------------------------|----------------------------------|-----------------|--------------------------------------------------------------------|-----------------------------------------------------------------------|
| Cultural Turn                                     | 1808.7                           | 0.61            | 3.043%                                                             | 1.968%                                                                |
| 20 <sup>th</sup> Century Labor History            | 1617.7                           | 0.61            | 2.785%                                                             | 1.811%                                                                |
| 19 <sup>th</sup> Century African American History | 780.8                            | 0.59            | 1.848%                                                             | 1.286%                                                                |
| Rural Social History                              | 764.6                            | 0.56            | 3.590%                                                             | 2.789%                                                                |
| Women and Gender                                  | 747.3                            | 0.57            | 2.899%                                                             | 2.192%                                                                |
| Political History (Revolutions)                   | 567.4                            | 0.53            | 8.398%                                                             | 7.306%                                                                |
| Slavery in the Americas                           | 474.6                            | 0.60            | 0.913%                                                             | 0.609%                                                                |
| Sociology and History                             | 451.0                            | 0.53            | 8.168%                                                             | 7.204%                                                                |
| Colonies and Empires                              | 396.2                            | 0.56            | 2.022%                                                             | 1.587%                                                                |
| East Asian History                                | 384.8                            | 0.58            | 1.017%                                                             | 0.722%                                                                |

To examine associations between student’s dissertation topics and their likelihood of later having students of their own, we first formed a corpus of all dissertation abstracts of historians who finished their PhDs in the 1980s and ‘90s. Next, we used Dunning’s log-likelihood statistic to compare dissertation abstracts of researchers with students (Table H) to those without students (Table I).

**Table I. Top 5 topics that are overrepresented among dissertation writers (graduation dates between 1980 and 1999) *without* students (11454 documents)**

| Topic         | Dunning Log-Likelihood Statistic | Frequency Score | Average Topic Weight, Dissertation Writers <i>with</i> Descendants | Average Topic Weight, Dissertation Writers <i>without</i> Descendants |
|---------------|----------------------------------|-----------------|--------------------------------------------------------------------|-----------------------------------------------------------------------|
| Organizations | 1794.5                           | 0.38            | 1.730%                                                             | 2.813%                                                                |

|                                                 |        |      |        |        |
|-------------------------------------------------|--------|------|--------|--------|
| Education                                       | 1428   | 0.39 | 1.649% | 2.579% |
| Christianity                                    | 1263.6 | 0.42 | 2.675% | 3.748% |
| Political History of the Cold War               | 1249.8 | 0.35 | 0.688% | 1.286% |
| Military History                                | 1238.3 | 0.40 | 1.754% | 2.634% |
| Historiography (Archives)                       | 670.9  | 0.44 | 2.970% | 3.767% |
| 20 <sup>th</sup> Century British Foreign Policy | 649.0  | 0.34 | 0.327% | 0.627% |
| British Early Modern Political History          | 520.7  | 0.37 | 0.429% | 0.723% |
| 19 <sup>th</sup> Century U.S. Political History | 437.1  | 0.37 | 0.336% | 0.576% |
| U.S. Political History                          | 424.3  | 0.43 | 1.464% | 1.913% |

## References

1. Blei DM, Lafferty JD. A correlated topic model of science. *The Annals of Applied Statistics*. 2007; 1, no. 1, pp. 17-35.
2. Roberts ME, Stewart BM, Tingley D. stm: R package for structural topic models. *Journal of Statistical Software*. 2014; 10, no. 2: 1-40.
3. Mimno D, Wallach HM, Talley E, Leenders M, McCallum A. Optimizing semantic coherence in topic models. *Proceedings of the Conference on Empirical Methods in Natural Language Processing, Association for Computational Linguistics*. 2011, July 27: 262-272.
4. Blevins C, Mullen L. Jane, John ... Leslie? A historical method for algorithmic gender prediction. *Digital Humanities Quarterly*. 2015; 9, no 3.
5. Data from Social Security Administration. Baby names from social security card applications – National data. [cited 2020, June 14]. Available from: <https://catalog.data.gov/dataset/baby-names-from-social-security-card-applications-national-level-data>
6. Python gender-guesser library. [cited 2020, June 14]. Available from: <https://github.com/lead-ratings/gender-guesser>.

7. For the dataset, see Michael J. Dictionary of first names and gender. [cited 2020, June 14]. Available from: <ftp://ftp.heise.de/pub/ct/listings/0717-182.zip>
8. For the comparison of name-to-gender inference services, see Santamaría L, Mihaljević H. Comparison and benchmark of name-to-gender inference services. PeerJ Computer Science. 2018; 4, e. 156. [cited 2020, June 14]. Available from: <https://peerj.com/articles/cs-156.pdf>
9. Dunning T. Accurate methods for the statistics of surprise and coincidence. Computational Linguistics. 1993, March; 19, no. 1: 61–74.
