# Supplementary material for: Diversifying history: A large-scale analysis of changes in researcher demographics and scholarly agendas
Source: PubMed Central journal article supplement (PMC8769356; doi:10.1371/journal.pone.0262027), 2022-01-19
Supplement: pone.0262027.s002.pdf [file pone.0262027.s002.pdf]

## **S1 Data**

**“Differences within Topics: Gender Differences in Articles Mentioning Gender at least 10 Times” within OSF Repository for “Diversifying History” (DOI: 10.17605/OSF.IO/V4YSH).**

This file (last modified 25 May 2020) details differences in how men and women write about topics.

[https://github.com/srisi/gender\\_history/blob/master/writeups/differences\\_within\\_topics.md](https://github.com/srisi/gender_history/blob/master/writeups/differences_within_topics.md)

All data, tables, and supplemental write-ups not mentioned in the above figures are included in this OSF repository (DOI: 10.17605/OSF.IO/V4YSH). This includes iPython notebooks and R scripts.
